# Supplementary material
Source: MDPI journal article supplement (https://www.mdpi.com/2073-4344/11/2/158)
Supplement: s1 [file s1]

# Supplementary Materials: Methanol, Ethanol, and Formic Acid Oxidation on New Platinum-Containing Catalysts

Vladislav S. Menshikov, Ivan N. Novomlinsky, Sergey V. Belenov, Anastasya A. Alekseenko, Olga I. Safronenko and Vladimir E. Guterman \*

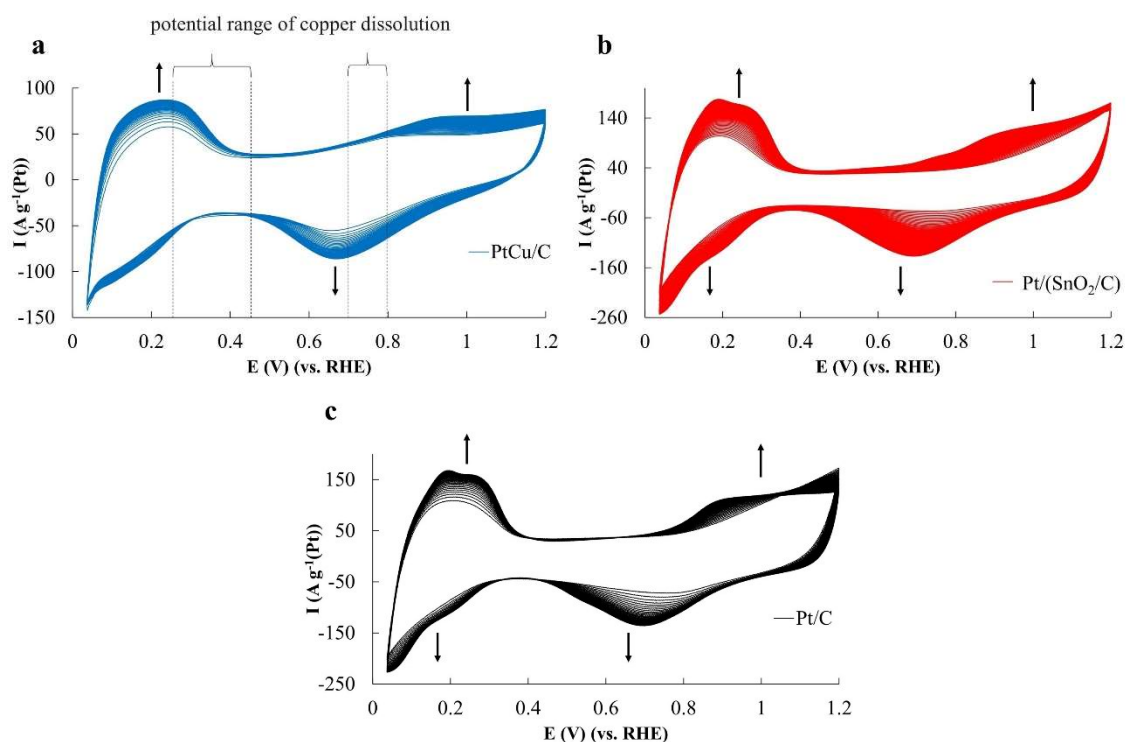

Fig. S1. The catalysts cyclic voltammograms: 100 cycles of surface activation (a) PtCu/C, (b) Pt/(SnO<sub>2</sub>/C) (c) Pt/C JM20.

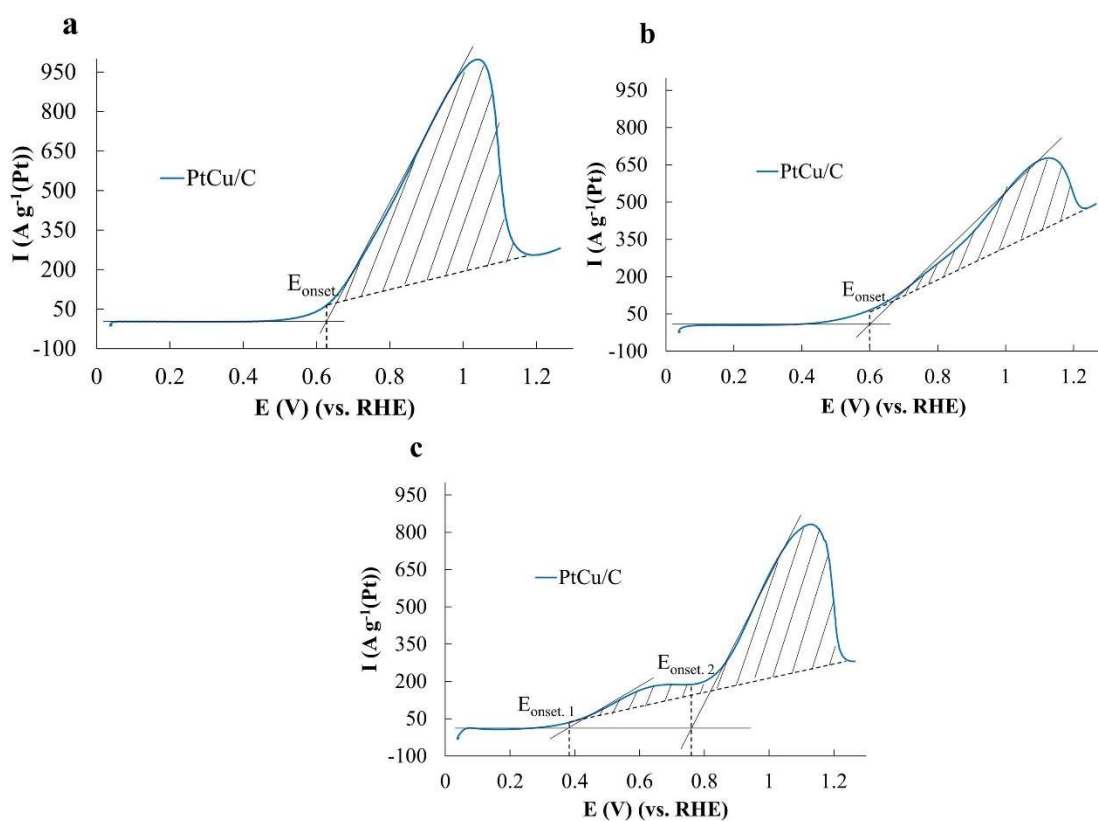

Fig. S2. Determining the amount of electricity in (a) MOR, (b) EOR, (c) FAOR by CVs for PtCu/C electrocatalyst. (C) - There are two stages of formic acid oxidation.
